## COUPLED DYNAMICS OF BEHAVIOR AND DISEASE CONTAGION AMONG ANTAGONISTIC GROUPS

PAUL E. SMALDINO<sup>1,\*</sup> AND JAMES HOLLAND JONES<sup>2</sup>

October 5, 2020

**Abstract:** Disease transmission and behavior change are both fundamentally social phenomena. Behavior change can have profound consequences for disease transmission, and epidemic conditions can favor the more rapid adoption of behavioral innovations. We analyze a simple model of coupled behavior-change and infection in a structured population characterized by homophily and outgroup aversion. Outgroup aversion slows the rate of adoption and can lead to lower rates of adoption in the later-adopting group or even behavioral divergence between groups when outgroup aversion exceeds positive ingroup influence. When disease dynamics are coupled to the behavior-adoption model, a wide variety of outcomes are possible. Homophily can either increase or decrease the final size of the epidemic depending on its relative strength in the two groups and on  $R_0$  for the infection. For example, if the first group is homophilous and the second is not, the second group will have a larger epidemic. Homophily and outgroup aversion can also produce dynamics suggestive of a “second wave” in the first group that follows the peak of the epidemic in the second group. Our simple model reveals complex dynamics that are suggestive of the processes currently observed under pandemic conditions in culturally and/or politically polarized populations such as the United States.

**Keywords:** transmission dynamics; coupled contagion; homophily; outgroup aversion; social distancing

### 1. INTRODUCTION

Behavior can spread through communication and social learning like an infection through a community (Bass, 1969; Centola, 2018). Cavalli-Sforza and Feldman, who pioneered treating cultural transmission in an analogous manner to genetic transmission, noted that “another biological model may offer a more satisfactory interpretation of the diffusion of innovations. The model is that of an epidemic” (Cavalli-Sforza and Feldman, 1981, 32-33). The biological success of *Homo sapiens* has been attributed to its capacity for cumulative culture, and particularly to the rapid and flexible adaptability that arises from social learning (Henrich, 2015). Adoption of adaptive behaviors during an epidemic of an infectious disease could be highly beneficial to both individuals and the population in which they are embedded (Fenichel et al., 2011). Coupling models of behavioral adoption and the transmission of infectious disease, what we call *coupled contagion*

---

<sup>1</sup>UNIVERSITY OF CALIFORNIA, MERCED

<sup>2</sup>STANFORD UNIVERSITY

*E-mail address:* paul.smaldino@ucmerced.edu.

models, may thus provide important insights for understanding dynamics and control of epidemics. While we might expect strong selection—both biological and cultural—for adaptive responses to epidemics, complications such as the potentially differing time scales of culture and disease transmission and the existence of social structures that shape adoption may complicate convergence to adaptive behavioral solutions. In this paper, we explore the joint role of *homophily*—the tendency to form ties with people similar to oneself—and *outgroup aversion*—the tendency to avoid behaviors preferentially associated with an outgroup.

Several previous studies have considered the coupled contagion of behavior and infection, usually focused on cases where the behavior is one that decreases the spread of the disease (such as social distancing) and sometimes using the assumption that increased disease prevalence promotes the spread of the behavior (Tanaka et al., 2002; Epstein et al., 2008; Funk et al., 2010; Verelst et al., 2016; Fast et al., 2015; Fu et al., 2017; Hébert-Dufresne et al., 2020; Mehta and Rosenberg, 2020). These models typically assume that individuals differ only in behavior and disease status. Thus, the spread of both disease and behavior depend primarily on rates of behavior transmission and disease recovery. This is true even of models in which the population is structured on networks. Network structure can change the dynamics of contagion. However, contrary to the assumptions of most models, behavioral distributions on social networks are anything but random. People assort in highly non-random ways (McPherson et al., 2001) and these non-random associations both drive and are driven by social identity. This suggests that the role of social identity is an important, but under-studied, component of coupled contagion models.

Identity exerts a powerful force on the dynamics of behavior (Hogg and Abrams, 2007; Bishop, 2009; Mason, 2018; Smaldino, 2019; Klein, 2020), and this matters for the dynamics of infection. For example, Salathé and Bonhoeffer (2008) showed that if rates of vaccine adherence cluster on networks, overall vaccination rates needed for herd immunity can be substantially higher than suggested by models that assume random vaccination. Members of opposed identity groups not only engage with the world differently, they can react in divergent ways to identical stimuli. Asked to watch political debates or hear political arguments, partisans often grow more strongly partisan, to the consternation of moderates (Taber et al., 2009). In the U.S., partisan identities have become increasingly defined in terms of their opposition to the opposing party (Abramowitz and Webster, 2016). When considering the adoption of products, consumers often become disenchanted with otherwise attractive purchases if the products are associated with identity groups viewed as different from their own (Berger and Heath, 2007, 2008). Smaldino et al. (2017) modeled the spread of a behavior among members of two groups who responded positively to the behavioral contagion but tended to reject it if it was overly associated with the outgroup. They showed that outgroup aversion not only decreased the overall rate of adoption, but could also delay or even entirely suppress adoption in one of the groups.

Here, we consider how identity, and particularly aversion to behaviors adopted by an outgroup, influences the spread of novel behaviors that consequently affect the transmission of infectious disease. The model we will present is complex, and hence challenging

75 to analyze. To help us make sense of the dynamics, we will first describe the dynamics  
of infection and behavior adoption in isolation, and then explore the full coupled model.

## 2. THE SIR MODEL OF INFECTION WITH HOMOPHILY

78 We model infection in a population in which individuals can be in one of three states:  
Susceptible, Infected, and Recovered. When susceptibles interact with infected individu-  
als, they become infected with a rate equal to the effective transmissibility of the disease,  
81  $\tau$ . Infected individuals recover with a constant probability  $\rho$ . This is the well-known  
SIR model of epidemics (Tolles and Luong, 2020). The baseline model assumes random  
interactions governed by mass action, and the dynamics are described by well-known  
84 differential equations (see Supplemental Materials). This model yields the classic dy-  
namics in which the susceptible and recovered populations appear as nearly-mirrored  
sigmoid, while the rate of infected individuals rises and falls (Figure S1). The threshold  
87 for the epidemic is given by the basic reproduction number,  $R_0$ , which is a measure of  
the expected number of secondary cases caused by a single, typical primary case at the  
outset of an epidemic and occurs when  $R_0 > 1$ . For the basic SIR model in a closed  
90 population,  $R_0 = \frac{\tau}{\rho}$ .

Our analysis will focus on scenarios where individuals assort based on identity. In  
this case, assume that individuals all belong to one of two identity groups, indicated  
93 with the subscript 1 or 2. Let  $w_i$  be the probability that interactions are with one's  
ingroup,  $i \in \{1, 2\}$ . It is therefore a measure of homophily; populations are homophilous  
when  $w_i > 0.5$ . It is important to recognize that groups can differ in their homophily  
96 (Morris, 1991). For example, if groups differ in socioeconomic class and group 1 tends  
to employ members of a group 2 as service workers, homophily will be higher for group  
1; a member of group 2 is more likely to encounter members of group 1 than the reverse.  
99 We can update the equations governing infection dynamics for members of group 1, with  
analogous equations governing members of group 2.

$$\begin{aligned}\frac{dS_1}{dt} &= -\tau S_1 (w_1 I_1 + (1 - w_1) I_2) \\ \frac{dI_1}{dt} &= \tau S_1 (w_1 I_1 + (1 - w_1) I_2) - \rho I_1 \\ \frac{dR_1}{dt} &= \rho I_1\end{aligned}$$

102 We assume the disease breaks out in one of the two groups, so the initial number  
of infected in group 1 is small but nonzero, while the initial number of infected in  
group 2 is exactly zero. Without loss of generality, we have assumed that group 1 is  
always infected first. When homophily is low, the model exhibits standard SIR dynamics  
105 approximating a single unified population. When an infection breaks out in group 1,  
homophily can delay the outbreak of the epidemic in group 2. Homophily for each group  
works somewhat synergistically, but the effect is dominated by  $w_2$ . This is because the  
108 infection spreads rapidly in a homophilous group 1, and if group 2 is not homophilous, its  
members will rapidly become infected. However, if group 2 is homophilous, its members

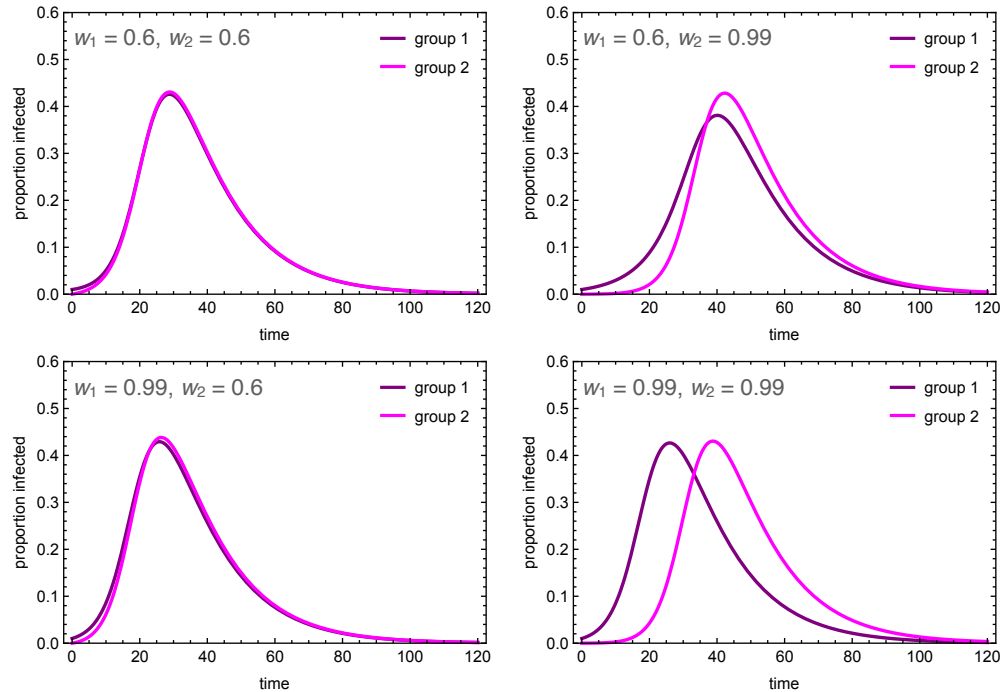

FIGURE 1. Dynamics of the infected population of each group under low and high homophily ( $w_i = 0.6, 0.99$ ). Other parameters used were  $\tau = 0.3$ ,  $\rho = 0.07$ ,  $I_1(0) = 0.01$ ,  $I_2(0) = 0$ .

111 can avoid the infection for longer, particularly when group 1 is also homophilous. If  
 112 only group 2 is homophilous, the initial outbreak will be delayed, but the peak infection  
 113 rate in group 2 can actually be higher than in group 1, as the infection is driven by  
 114 interactions with both populations (Figure 1).

114 We also considered the case in which the transmissibility of the infection can be  
 115 reduced to very near the recovery rate, so that  $R_0$  is very close to 1. In this case,  
 116 homophily can protect groups where infection did not originally break out by keeping  
 117 members relatively separated from the infection group (Figure S3).

### 3. BEHAVIORAL CONTAGION WITH OUTGROUP AVERSION

120 We model behavior adoption as a susceptible-infectious-susceptible (SIS) process, in  
 121 which individuals can oscillate between adoption and non-adoption of the behavior indef-  
 122 nitely. We view this as more realistic than an SIR process for preventative-but-transient  
 123 behaviors like social distancing or wearing face masks. To avoid confusion with infection  
 status, we denote individuals who adopted the preventative behavior as Careful ( $C$ ),  
 and those who have not as Uncareful ( $U$ ). Unlike a disease, which is reasonably mod-  
 eled as equally transmissible between any susceptible-infected pairing, where behavior

126 is concerned, susceptible individuals are more likely to adopt when interacting with in-  
group adopters, but less likely to adopt when interacting with outgroup adopters. We  
model the behavioral dynamics for members of group 1 are as follows, with analogous  
129 equations<sup>1</sup> governing members of group 2:

$$\begin{aligned}\frac{dU_1}{dt} &= -(\alpha_1 + \beta C_1)U_1 + (\gamma C_2 + \delta)C_1 \\ \frac{dC_1}{dt} &= (\alpha_1 + \beta C_1)U_1 - (\gamma C_2 + \delta)C_1\end{aligned}$$

Members of group  $i$  may spontaneously adopt the behavior independent of direct social  
influence, and do so at rate  $\alpha_i$ . This adoption may be due to individual assessment of the  
132 behavior's utility, to influences separate from peer mixing, such as from media sources,  
or to socioeconomic factors that make behavior adoption more or less easy for certain  
groups. For these reasons, we assume that groups can differ on their rates of spontaneous  
135 adoption. In reality, it is possible for groups to differ on all four model parameters, all of  
which can influence differences in adoption rates. For simplicity, we restrict our analysis  
to differences in spontaneous adoption.

138 Uncareful individuals are positively influenced to become careful by observing careful  
individuals of their own group, with strength  $\beta$ . However, this is countered by the force  
of outgroup aversion,  $\gamma$ , whereby individuals may cease being careful when they observe  
141 this behavior among members of the outgroup. The behavior is eventually discarded at  
rate  $\delta$ , representing financial and/or psychological costs of continuing to adopt preventive  
behaviors like social distancing.

144 This model assumes no explicit homophily in terms of behavioral influence. On the  
one hand, it seems obvious that we observe and communicate with those in our own  
group more than other groups. On the other hand, opportunities for observing outgroup  
147 behaviors are abundant in a digitally-connected world, which alter the conditions for  
cultural evolution (Acerbi, 2019). For simplicity, we do not add explicit homophily terms  
to this system. Instead, we simply adjust the relative strengths of ingroup influence and  
150 outgroup aversion,  $\beta/\gamma$ . When this ratio is higher, it reflects stronger homophily for  
behavioral influence.

Numerical simulations that illustrate the influence of outgroup aversion are depicted  
153 in Figure 2. In all cases, the behavior is first adopted by group 1. In the absence of  
outgroup aversion, both groups adopt the behavior at saturation levels, with group 2  
being slightly delayed. When outgroup aversion is added, the delay increases, but more  
156 importantly, overall adoption declines for both groups. This decline continues as long as  
the strength of outgroup aversion is less than the strength of positive ingroup influence.  
A phase transition occurs here (Figure 2C,D). Although group 2 may initially adopt the  
159 behavior, adoption is subsequently suppressed, resulting in a polarizing behavior that is  
abundant in group 1 but nearly absent in group 2.

---

<sup>1</sup>Because all individuals have either adopted or not,  $U_1 = 1 - C_1$ , these coupled equations can be replaced by a single equation through substitutions. For intuitive reasons, we leave them as two coupled equations.

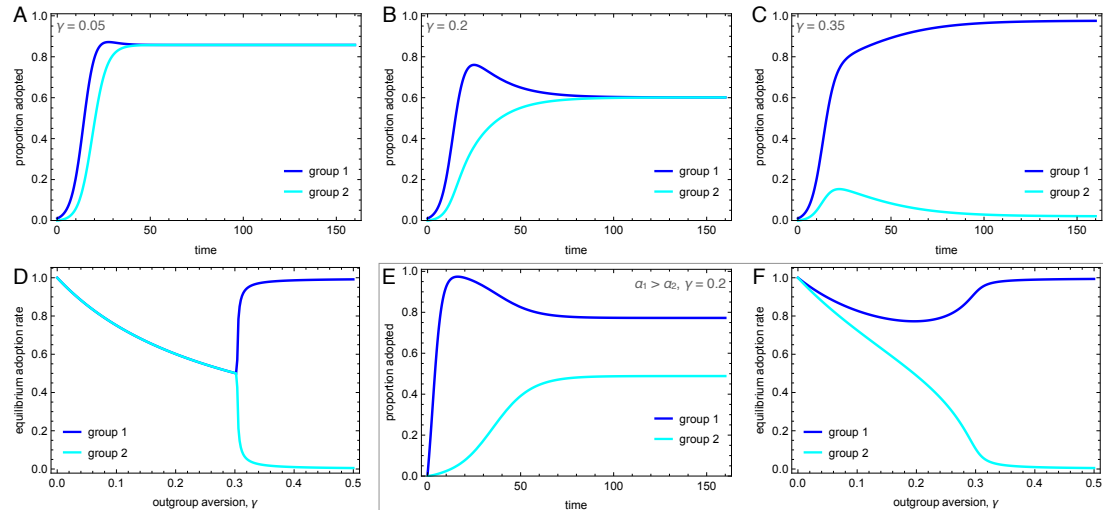

FIGURE 2. Dynamics of the behavioral adoption. (A-C) Behavior adoption dynamics in each group for different levels of outgroup aversion,  $\gamma$ . Parameters used were  $\alpha_1 = \alpha_2 = 0.001$ ,  $\beta = 0.3$ ,  $\delta = 0$ ,  $C_1(0) = 0.01$ ,  $C_2(0) = 0$ . (D) Equilibrium adoption rates for each group as a function of outgroup aversion,  $\gamma$ . A bifurcation occurs when outgroup aversion overpowers the forces of positive influence. (E) Behavior adoption dynamics for  $\gamma = 0.2$  where group 1 has a higher spontaneous adoption rate,  $\alpha_1 = 0.1$ . Here, the two groups converge to different equilibrium adoption rates. (F) Equilibrium adoption rates for each group as a function of outgroup aversion,  $\gamma$ , when  $\alpha_1 = 0.1$ .

We also consider the case in which one group has a higher intrinsic adoption rate, which could be driven by differences in personality types, norms, or media exposure between the two groups. When  $\alpha_1 > \alpha_2$ , the equilibrium adoption rate for group 1 could be considerably higher than for group 2, even when ingroup positive influence was greater than outgroup aversion (Figure 2E, F). Note that these differences arise entirely because of outgroup aversion. When  $\gamma = 0$ , both groups adopt at maximum levels.

Outgroup aversion has a strong influence on adoption dynamics. It can delay adoption, reduce equilibrium adoption rates, and even suppress adoption entirely in the later-adopting group. As we will see, when the behavior being adopted influences disease transmission, quite complex dynamics can emerge.

#### 4. COUPLED CONTAGION WITH HOMOPHILY AND OUTGROUP AVERSION

Before we explore the coupled dynamics of this system, we must add one more consideration to the model. We focus on the adoption of preventative behaviors that decrease the effective transmission rate of the infection, such as social distancing or wearing face masks. We model this by asserting that the transmission rate is  $\tau_C$  for careful individuals and  $\tau_U$  for uncared individuals, such that  $\tau_U \geq \tau_C$ . When considering the

TABLE 1. Model parameters.

| Parameter  | Definition                                          |
|------------|-----------------------------------------------------|
| $\tau_C$   | disease transmissibility for careful individuals    |
| $\tau_U$   | disease transmissibility for uncaredful individuals |
| $\rho$     | disease recovery rate                               |
| $w_i$      | homophily for group $i$                             |
| $\alpha_i$ | spontaneous behavior adoption rate for group $i$    |
| $\beta$    | ingroup positive influence on behavior              |
| $\gamma$   | outgroup negative influence on behavior             |
| $\delta$   | behavior discard rate                               |

177 interaction between careful and uncaredful individuals, we use the geometric mean, so  
the transmissibility between SU and IU is  $\sqrt{\tau_U \tau_C}$ .

The model has six compartments, with two-letter abbreviations denoting the disease and behavioral state (Figure S4). The coupled dynamics for members of group 1 are as follows, with analogous equations governing members of group 2, such that the full system is defined by 12 coupled differential equations. A list of all parameters is presented in Table 1.

$$\begin{aligned} \frac{d(SU_1)}{dt} &= [\delta + \gamma(SC_2 + IC_2 + RC_2)](SC_1) - [\alpha_1 + \beta(SC_1 + IC_1 + RC_1)](SU_1) - \\ &\quad \tau_U(SU_1)[w_1(IU_1) + (1 - w_1)IU_2] - \sqrt{\tau_U \tau_C}(SU_1)[w_1(IC_1 + (1 - w_1)IC_2)] \\ \frac{d(SC_1)}{dt} &= -[\delta + \gamma(SC_2 + IC_2 + RC_2)](SC_1) + [\alpha_1 + \beta(SC_1 + IC_1 + RC_1)](SU_1) - \\ &\quad \sqrt{\tau_U \tau_C}(SC_1)[w_1(IU_1) + (1 - w_1)IU_2] - \tau_C(SC_1)[w_1(IC_1 + (1 - w_1)IC_2)] \\ \frac{d(IU_1)}{dt} &= [\delta + \gamma(SC_2 + IC_2 + RC_2)](IC_1) - [\alpha_1 + \beta(SC_1 + IC_1 + RC_1)](IU_1) + \\ &\quad \tau_U(SU_1)[w_1(IU_1) + (1 - w_1)IU_2] + \sqrt{\tau_U \tau_C}(SU_1)[w_1(IC_1 + (1 - w_1)IC_2)] - \rho(IU_1) \\ \frac{d(IC_1)}{dt} &= -[\delta + \gamma(SC_2 + IC_2 + RC_2)](IC_1) + [\alpha_1 + \beta(SC_1 + IC_1 + RC_1)](IU_1) + \\ &\quad \sqrt{\tau_U \tau_C}(SC_1)[w_1(IU_1) + (1 - w_1)IU_2] + \tau_C(SC_1)[w_1(IC_1 + (1 - w_1)IC_2)] - \rho(IC_1) \\ \frac{d(RU_1)}{dt} &= [\delta + \gamma(SC_2 + IC_2 + RC_2)](RC_1) - [\alpha_1 + \beta(SC_1 + IC_1 + RC_1)](RU_1) + \rho(IU_1) \\ \frac{d(RC_1)}{dt} &= -[\delta + \gamma(SC_2 + IC_2 + RC_2)](RC_1) + [\alpha_1 + \beta(SC_1 + IC_1 + RC_1)](RU_1) + \rho(IC_1) \end{aligned}$$

180 Behavioral adoption is independent of infection status in this model. This may not  
be a realistic assumptions for some systems, such as Ebola, where the both the infection  
status of the adopter and the perceived incidence in the population are likely to influence  
behavior. The assumption is more realistic for infections like influenza and COVID-19,  
183 where infection status is not always transparent and decisions are likely to be made on  
the basis of more abstract socially-transmitted information. To make the behavioral  
adoption most meaningful, we focus on the case where instantaneous and universal  
186 adoption of the careful behavior would decrease the disease transmissibility so that



$R_0 < 1$ . That is, if everyone immediately adopted the behavior, the epidemic would fizzle out. However, behavior adoption does not typically work this way. We have already  
189 observed that under assumptions of between-group variation and outgroup aversion, a behavior is likely to be adopted neither instantaneously nor universally. The question we tackle now is how those socially-driven facets of behavioral adoption influence disease  
192 dynamics.

Figure 3 illustrates the wide range of possible disease dynamics under varying assumptions of homophily and outgroup aversion. A wider range of homophily values are explored in the Supplemental Materials (Figures S5, S6). In the absence of either homophily or outgroup aversion, our results mirror previous work on coupled contagion in which the adoption of inhibitory behaviors reduces peak infection rates, flattening the  
195 curve of infection. Due to differences in spontaneous adoption rates, however, group 2 may see a higher peak infection rate even when the infection breaks out in group 1, because the inhibitory behavior spreads more slowly in that group (Figure 3A).

Homophilous interactions further lower infection rates. If group 1 alone is homophilous, the infection rate declines in that group, while peak infections actually increase in group 2 (Figure 3C). This is because group 1 adopts the careful behavior early, decreasing their transmission rate and simultaneously avoiding contact with the less careful members of group 2, who become infected through their frequent contact with group 1. If group 2 alone is homophilous, on the other hand, the infection is staved off even more so than if  
201 both groups are homophilous (Figure 3B, D). This is because members of group 2 avoid contact with group 1 until the careful behavior has been widely adopted, while members of group 1 diffuse their interactions with some members of group 2, and these are less  
204 likely to lead to new infections.

Outgroup aversion considerably changes these dynamics. First and foremost, outgroup aversion leads to less widespread adoption of careful behaviors, dramatically increasing  
213 the size of the epidemic. Moreover, because under many circumstances there will be between-group differences in equilibrium behavior-adoption rates, this can lead to dramatic group differences in infection dynamics. In the absence of outgroup aversion, we saw that homophily in group 2 could lead to an almost total suppression of the epidemic. Not so with outgroup aversion, in which the peak infection rates *increase* relative to the low homophily case (Figure 3E, F). This occurs because homophily causes a delay in the infection onset in group 2. Behavioral adoption slows the epidemic initially in both groups. However, when the infection finally reaches group 1, behavioral adoption has decreased past its maximum due to the outgroup aversion, causing peak infections in  
216 both groups to soar.

The dynamics are particularly interesting for the case where group 1 is homophilous. Recall that this is the group in which the epidemic first breaks out. Because of homophily and rapid behavior adoption, the epidemic is initially suppressed in this group. However, due to slower and incomplete behavior adoption, the infection spreads rapidly in group 2. As the infection peaks in group 2 while group 1 decreases its behavior adoption rate, we observe a delayed “second wave” of infection in group 1, well after the infection has peaked in group 2 (Figure 3G). This effect is exacerbated when both groups are homophilous, as the epidemic runs rampant in the less careful group 2 (Figure 3H). As  
225  
228



COUPLED DYNAMICS OF BEHAVIOR AND DISEASE

9

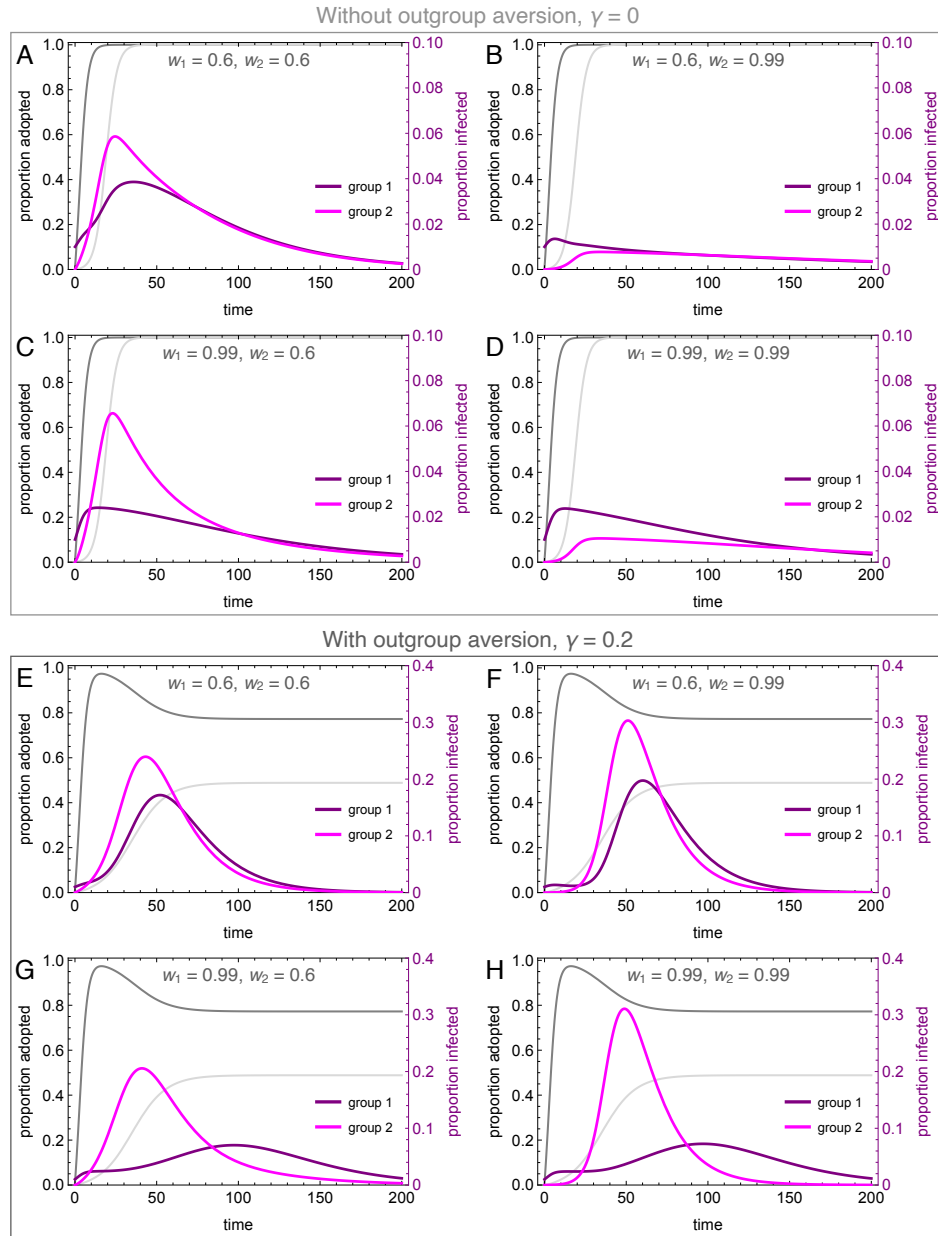

FIGURE 3. Coupled contagion dynamics when the behavior leads to highly effective reduction in transmissibility, under varying conditions of homophily and outgroup aversion. Notice difference in y-axis scale for infection rate between top and bottom sets of graphs. Parameters used:  $\tau_U = 0.3$ ,  $\tau_C = 0.069$ ,  $\rho = 0.07$ ,  $\alpha_2 = 0.1$ ,  $\alpha_2 = 0.001$ ,  $\beta = 0.3$ ,  $\delta = 0$ ,  $SU_1(0) = 0.98$ ,  $SC_1(0) = 0.01$ ,  $IU_1(0) = 0.01$ ,  $IC_1(0) = RU_1(0) = RC_1(0) = 0$ ,  $SU_2(0) = 1.0$ ,  $SC_2(0) = IU_2(0) = IC_2(0) = RU_2(0) = RC_2(0) = 0$ .

231 shown in the Supplementary Material, the timing of the second wave is also delayed to  
a greater extent when the adopted behavior is more efficacious at reducing transmission  
(Figure S7).

234

## 5. DISCUSSION

It is well known that disease transmission is influenced by behavior. What is often  
overlooked is how behavior itself changes within heterogeneous cultural populations.  
237 Both population structure and social identity influence who interacts with whom, af-  
fecting disease transmission, and who learns from whom, affecting behavior change. We  
have highlighted two of these forces—homophily and outgroup aversion—and shown  
240 their dramatic influence on disease dynamics in a simple model.

Homophily is often treated as though it were a global propensity for assortment by type  
(e.g. Centola, 2011). However, homophily is frequently observed to a greater or lesser  
243 degree across subgroups, a phenomenon known as differential homophily (Morris, 1991).  
There are several different interpretations of homophily in these simple models. When  
the homophily of group 1 is less than group 2, group 1 can be interpreted as “frontline”  
246 workers, who are exposed to a broader cross-section of the population by nature of their  
work. Outgroup avoidance of this group’s adopted protective behavior can arise if there  
are status differentials across the groups. Prestige bias is a mechanism that can drive  
249 differential uptake of novel behavior by different groups (Boyd and Richerson, 1985), for  
which there is quite broad support (Jiménez and Mesoudi, 2019). When both groups  
are highly homophilous and outgroup aversion is strong, the resulting dynamics suggest  
252 the case of negative partisanship (Abramowitz and Webster, 2016), in which differences  
in the relative size of the epidemic will be driven purely by differences in the adoption  
rates by the two groups, including those differences induced by outgroup aversion.

255 Homophily has three main effects in our coupled-contagion models. When homophily  
is strong, it can protect the uninfected segment of the population (i.e., group 2) if the  
transmissibility of the infection is sufficiently low (Figure S3) or if outgroup aversion is  
258 negligible (Figure 3). However, when  $R_0$  is high enough and outgroup aversion induces  
group differences in behavior adoption, strong homophily among group 2 can lead to  
larger, albeit delayed, epidemics in the initially-uninfected segment of the population.  
261 Finally, when homophily is asymmetric and higher in group 1, it can substantially reduce  
the size of the epidemic in that group because the protective behavior spreads rapidly at  
the outset of the epidemic when there is the greatest potential to reduce the epidemic’s  
264 toll.

Incorporating adaptive behavior into epidemic models has been shown to significantly  
alter dynamics (Fenichel et al., 2011). Prevalence-elastic behavior (Funk et al., 2010) is  
267 a behavior that increases with the growth of an epidemic. While it may be protective,  
it can also lead to cycling of incidence, which can prolong epidemics. Similarly, the  
adoption of some putatively-protective behaviors that are actually ineffective can be  
270 driven by the existence of an epidemic when the cost of adoption is sufficiently low  
(Tanaka et al., 2009). We have shown in this paper that group-identity processes can  
have large effects, leading groups that would otherwise respond adaptively to the threat

273 of an epidemic to behave in ways that put them, and the broader populations in which  
they are embedded, at risk.

The context of the ongoing COVID-19 pandemic provides some interesting and timely  
276 perspective on the relationship between behavior, adaptive or otherwise, and transmis-  
sion dynamics. While there remains much uncertainty about the infection fatality ratio  
of COVID-19, and how this varies according to individual, social, and environmental  
279 context, it is clear that the great majority of infections do not lead to death (Russell  
et al., 2020; Meyerowitz-Katz and Merone, 2020). Furthermore, the extensive presymp-  
tomatic (or even asymptomatic) transmission of the SARS-CoV-2 (He et al., 2020; Li  
282 et al., 2020; Arons et al., 2020) is likely to reduce associations between behavior and local  
infection rates. We expect that such a situation will not induce strong prevalence-elastic  
behavioral responses, and that the sorts of identity-based responses we describe here will  
285 dominate the behavioral effects on transmission.

In terms of social interaction and adoption dynamics, group identity exerts its in-  
fluence by way of homophily, a powerful social force. Aral et al. (2009), for example,  
288 showed that homophily accounted for more than 50% of contagion in a natural exper-  
iment on behavioral adoption. The effect of homophily on diffusion dynamics can be  
variable. For example, homophily can slow down convergence toward best responses in  
291 strategic networks (Golub and Jackson, 2012). This can be critical when the time scales  
of learning and infection are different. Homophily can also lower the threshold for de-  
sirability (or the selective advantage) required for adoption of a behavior. Creanza and  
294 Feldman (2014) showed that homophily and selection can have balancing effects—the  
selective advantage of a trait does not need to be as high to spread when it is trans-  
mitted assortatively by its bearers. In the case of our coupled-contagion model, strong  
297 homophily interferes with the adaptive adoption of protective behavior. Centola (2011)  
showed that homophily can increase the rate of adoption of health behaviors, but his ex-  
perimental population could assort only on positive cues, and had no ability to signal or  
300 perceive group identity. When homophily promotes negative partisanship (Abramowitz  
and Webster, 2016) with respect to the adoption of adaptive behavior, it can lead to  
quite complex outcomes, as we have outlined in this paper.

303 How do we intervene in a way to offset the pernicious effects of negative partisanship on  
the adoption of adaptive behavior? While it may seem obvious, strategies for spreading  
efficacious protective behaviors in a highly-structured population with strong outgroup  
306 aversion will require weakening the association between protective behaviors and par-  
ticular subgroups of the population. Given that we are writing this during a global  
pandemic in which perceptions and behaviors are highly polarized along partisan lines,  
309 attempts to mitigate partisanship in adaptive behavioral responses seem paramount to  
support.

The models we have analyzed in this paper are broad simplifications of the coupled  
312 dynamics of behavior-change and infection. It would therefore be imprudent to use  
them to make specific predictions. The goal of this approach is to develop strategic  
models in the sense of Holling (1966), sacrificing precision and some realism for general  
315 understanding of the potential interactions between social structure, outgroup aversion,

and coupled contagion (Levins, 1966; Smaldino, 2017). Such models provide a scaffold for the development of richer theories concerning coupled disease and behavioral contagions.

318

#### ACKNOWLEDGMENTS

This research is part of a project supported by NSF RAPID award BCS-2028160.

#### REFERENCES

- 321 Abramowitz, A. I. and Webster, S. (2016). The rise of negative partisanship and the  
nationalization of U.S. elections in the 21st century. *Electoral Studies*, 41:12–22.
- Acerbi, A. (2019). *Cultural Evolution in the Digital Age*. Oxford University Press.
- 324 Aral, S., Muchnika, L., and Sundararajana, A. (2009). Distinguishing influence-based  
contagion from homophily-driven diffusion in dynamic networks. *Proceedings of the  
National Academy of Sciences, USA*, 106(51):21544–21549.
- 327 Arons, M. M., Hatfield, K. M., Reddy, S. C., Kimball, A., James, A., Jacobs, J. R.,  
Taylor, J., Spicer, K., Bardossy, A. C., Oakley, L. P., Tanwar, S., Dyal, J. W., Harney,  
J., Chisty, Z., Bell, J. M., Methner, M., Paul, P., Carlson, C. M., McLaughlin, H. P.,  
330 Thornburg, N., Tong, S., Tamin, A., Tao, Y., Uehara, A., Harcourt, J., Clark, S.,  
Brostrom-Smith, C., Page, L. C., Kay, M., Lewis, J., Montgomery, P., Stone, N. D.,  
Clark, T. A., Honein, M. A., Duchin, J. S., and Jernigan, J. A. (2020). Presymptomatic  
333 SARS-CoV-2 infections and transmission in a skilled nursing facility. *New England  
Journal of Medicine*, 382(22):2081–2090.
- Bass, F. M. (1969). A new product growth for model consumer durables. *Management  
336 Science*, 15(5):215–227.
- Berger, J. and Heath, C. (2007). Where consumers diverge from others: Identity signal-  
ing and product domains. *Journal of Consumer Research*, 34(2):121–134.
- 339 Berger, J. and Heath, C. (2008). Who drives divergence? identity signaling, outgroup  
dissimilarity, and the abandonment of cultural tastes. *Journal of Personality and  
Social Psychology*, 95(3):593.
- 342 Bishop, B. (2009). *The big sort: Why the clustering of like-minded America is tearing  
us apart*. Houghton Mifflin Harcourt.
- Boyd, R. and Richerson, P. J. (1985). *Culture and the evolutionary process*. University  
345 of Chicago press, Chicago.
- Cavalli-Sforza, L. L. and Feldman, M. (1981). *Cultural transmission and evolution: A  
quantitative approach*, volume 16 of *Monographs in Population Biology*. Princeton  
348 University Press, Princeton.
- Centola, D. (2011). An experimental study of homophily in the adoption of health  
behavior. *Science*, 334(6060):1269–1272.
- 351 Centola, D. (2018). *How behavior spreads: The science of complex contagions*. Princeton  
University Press.
- Creanza, N. and Feldman, M. W. (2014). Complexity in models of cultural niche con-  
354 struction with selection and homophily. *Proceedings of the National Academy of Sci-  
ences*, 111(Supplement 3):10830–10837.

- Epstein, J. M., Parker, J., Cummings, D., and Hammond, R. A. (2008). Coupled con-  
357 tagion dynamics of fear and disease: mathematical and computational explorations.  
*PLoS One*, 3(12).
- Fast, S. M., González, M. C., Wilson, J. M., and Markuzon, N. (2015). Modelling the  
360 propagation of social response during a disease outbreak. *Journal of The Royal Society  
Interface*, 12(104):20141105.
- Fenichel, E. P., Castillo-Chavez, C., Ceddia, M. G., Chowell, G., Parra, P. A. G., Hick-  
363 ling, G. J., Holloway, G., Horan, R., Morin, B., Perrings, C., Springborn, M., Ve-  
lázquez, L., and Villalobos, C. (2011). Adaptive human behavior in epidemiological  
models. *Proceedings of the National Academy of Sciences*, 108(15):6306–6311.
- Fu, F., Christakis, N. A., and Fowler, J. H. (2017). Dueling biological and social conta-  
366 gions. *Scientific Reports*, 7:43634.
- Funk, S., Salathé, M., and Jansen, V. A. (2010). Modelling the influence of human  
369 behaviour on the spread of infectious diseases: a review. *Journal of the Royal Society  
Interface*, 7(50):1247–1256.
- Golub, B. and Jackson, M. O. (2012). How homophily affects the speed of learning and  
372 best-response dynamics. *The Quarterly Journal of Economics*, 127(3):1287–1338.
- He, X., Lau, E. H. Y., Wu, P., Deng, X., Wang, J., Hao, X., Lau, Y. C., Wong, J. Y.,  
Guan, Y., Tan, X., Mo, X., Chen, Y., Liao, B., Chen, W., Hu, F., Zhang, Q., Zhong,  
375 M., Wu, Y., Zhao, L., Zhang, F., Cowling, B. J., Li, F., and Leung, G. M. (2020). Tem-  
poral dynamics in viral shedding and transmissibility of COVID-19. *Nature Medicine*.
- Hébert-Dufresne, L., Mistry, D., and Althouse, B. M. (2020). Spread of infectious disease  
378 and social awareness as parasitic contagions on clustered networks. *arXiv preprint  
arXiv:2003.10604*.
- Henrich, J. (2015). *The Secret of Our Success: How Culture Is Driving Human Evolution,  
381 Domesticating Our Species, and Making Us Smarter*. Princeton University Press,  
Princeton.
- Hogg, M. A. and Abrams, D. (2007). Intergroup behavior and social identity. *The Sage  
384 handbook of social psychology: Concise student edition*, pages 335–360.
- Holling, C. S. (1966). The strategy of building models of complex ecological systems. In  
Watt, K. E. F., editor, *Systems Analysis in Ecology*, pages 195–214. Academic Press.
- 387 Jiménez, A. V. and Mesoudi, A. (2019). Prestige-biased social learning: current evidence  
and outstanding questions. *Palgrave Communications*, 5(1):20.
- Klein, E. (2020). *Why we're polarized*. Simon and Schuster.
- 390 Levins, R. (1966). The strategy of model building in population biology. *American  
Scientist*, 54(4):421–431.
- Li, R., Pei, S., Chen, B., Song, Y., Zhang, T., Yang, W., and Shaman, J. (2020). Substan-  
393 tial undocumented infection facilitates the rapid dissemination of novel coronavirus  
(sars-cov2). *Science*, 368(6490):489–493.
- Mason, L. (2018). *Uncivil agreement: How politics became our identity*. University of  
396 Chicago Press.
- McPherson, M., Smith-Lovin, L., and Cook, J. M. (2001). Birds of a feather: Homophily  
in social networks. *Annual Review of Sociology*, 27:415–444.

- 399 Mehta, R. S. and Rosenberg, N. A. (2020). Modeling anti-vaccine sentiment as a cultural  
pathogen. *Evolutionary Human Sciences*.
- Meyerowitz-Katz, G. and Merone, L. (2020). A systematic review and meta-analysis of  
402 published research data on COVID-19 infection-fatality rates. *International Journal  
of Infectious Diseases*.
- Morris, M. (1991). A log-linear modeling framework for selective mixing. *Mathematical  
405 Biosciences*, 107(2):349–377.
- Russell, T. W., Hellewell, J., Jarvis, C. I., van Zandvoort, K., Abbott, S., Ratnayake,  
R., group, C. C.-. w., Flasche, S., Eggo, R. M., Edmunds, W. J., and Kucharski,  
408 A. J. (2020). Estimating the infection and case fatality ratio for coronavirus disease  
(COVID-19) using age-adjusted data from the outbreak on the Diamond Princess  
cruise ship, February 2020. *Eurosurveillance*, 25(12):2000256.
- 411 Salathé, M. and Bonhoeffer, S. (2008). The effect of opinion clustering on disease out-  
breaks. *Journal of The Royal Society Interface*, 5(29):1505–1508.
- Smaldino, P. E. (2017). Models are stupid, and we need more of them. In Vallacher,  
414 R. R., Read, S. J., and Nowak, A., editors, *Computational social psychology*, pages  
311–331. Routledge.
- Smaldino, P. E. (2019). Social identity and cooperation in cultural evolution. *Behavioural  
417 Processes*, 161:108–116.
- Smaldino, P. E., Janssen, M. A., Hillis, V., and Bednar, J. (2017). Adoption as a social  
marker: Innovation diffusion with outgroup aversion. *The Journal of Mathematical  
420 Sociology*, 41(1):26–45.
- Taber, C. S., Cann, D., and Kucsova, S. (2009). The motivated processing of political  
arguments. *Political Behavior*, 31(2):137–155.
- 423 Tanaka, M. M., Kendal, J. R., and Laland, K. N. (2009). From traditional medicine  
to witchcraft: Why medical treatments are not always efficacious. *PLOS ONE*,  
4(4):e5192.
- 426 Tanaka, M. M., Kumm, J., and Feldman, M. W. (2002). Coevolution of pathogens and  
cultural practices: a new look at behavioral heterogeneity in epidemics. *Theoretical  
Population Biology*, 62(2):111–119.
- 429 Tolles, J. and Luong, T. (2020). Modeling epidemics with compartmental models. *JAMA*,  
323:2515–2516.
- Verelst, F., Willem, L., and Beutels, P. (2016). Behavioural change models for infectious  
432 disease transmission: a systematic review (2010–2015). *Journal of The Royal Society  
Interface*, 13(125):20160820.



435

## APPENDIX (ONLINE SUPPLEMENT) Coupled Dynamics of Behavior and Disease Contagion Among Antagonistic Groups

### APPENDIX A. THE SIR MODEL AND $R_0$

438 We model infection in a population in which individuals can be in one of three states:  
Susceptible, Infected, and Recovered. When susceptible individuals interact with in-  
fected individuals, they become infected with a rate equal to the effective transmissibility  
441 of the disease,  $\tau$ . Infected individuals recover with a constant probability  $\rho$ . This base-  
line model assumes random interactions governed by mass action, and the dynamics are  
described by the following well-known differential equations describing the proportion of  
444 the population in these three compartments:

$$\begin{aligned}\frac{dS}{dt} &= -\tau SI \\ \frac{dI}{dt} &= \tau SI - \rho I \\ \frac{dR}{dt} &= \rho I\end{aligned}$$

where  $S + I + R = 1$ .

447 This model yields the classic dynamics in which the susceptible and recovered popu-  
lations appear as nearly-mirrored sigmoids, while the rate of infected individuals rises  
and falls (Figure S1).

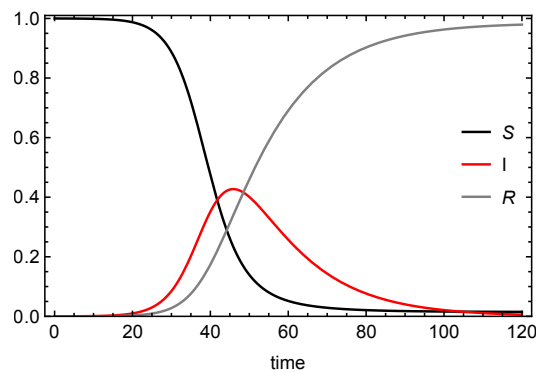

FIGURE S1. Classic SIR dynamics. Here  $\tau = 0.3$ ,  $\rho = 0.07$ .

The threshold for the epidemic is given by the basic reproduction number,  $R_0$ , which is a measure of the expected number of secondary cases caused by a single, typical at the outset of an epidemic and occurs when  $R_0 > 1$ .  $R_0$  is essentially the ratio of the rate of additional infections to the rate of removal of infections through recovery and possibly death. For the classic SIR model, the calculation is quite simple. We assume



that  $S \approx 1$  at the time of initial outbreak, and we are interested in the case where the rate of new infections exceeds the rate of recovery:

$$\begin{aligned}\tau SI - \rho I &> 0 \\ \tau I &> \rho I \\ R_0 = \frac{\tau}{\rho} &> 1\end{aligned}$$

## APPENDIX B. THE SIR MODEL WITH HOMOPHILY

450 We extend the SIR model to explore scenarios where individuals assort based on  
identity. In this case, assume that individuals all belong to one of two identity groups,  
indicated with the subscript 1 or 2. Let  $w_i$  be the probability that interactions are  
453 with one's ingroup,  $i \in 1, 2$ . It is therefore a measure of homophily; populations are  
homophilous when  $w_i > 0.5$ . Homophily can be asymmetric between groups, because  
456 members of one group may be more likely to have interactions with the outgroup than  
the other group. For example, low SES individuals, who often work service jobs, may  
be unable to avoid interactions with the outgroup.

We can update the equations governing infection dynamics for members of group 1,  
459 with analogous equations governing members of group 2:

$$\begin{aligned}\frac{dS_1}{dt} &= -\tau S_1 (w_1 I_1 + (1 - w_1) I_2) \\ \frac{dI_1}{dt} &= \tau S_1 (w_1 I_1 + (1 - w_1) I_2) - \rho I_1 \\ \frac{dR_1}{dt} &= \rho I_1\end{aligned}$$

As illustrated in Figure S2, when an infection breaks out in group 1, homophily  
can delay the outbreak of the epidemic in group 2. Homophily for each group works  
462 somewhat synergistically, but the effect is dominated by  $w_2$ . This is because the infection  
spreads rapidly in a homophilous group 1, and if group 2 is not homophilous its members  
will rapidly become infected. However, if group 2 is homophilous, its members can avoid  
465 the infection for longer, particularly when group 1 is also homophilous.

We also explored a scenario where  $R_0$  for the basic model was very close to 1, indicating  
a small epidemic (we used  $R_0 = 1.14$ ; Figure S3). When homophily was low ( $w = 0.6$ ),  
468 the populations mixed a lot. The proportion of infected individuals in group 1 briefly fell,  
as the majority of new infected individuals were in group 2. However, the groups quickly  
matched their pace and experienced the outbreak in tandem. When homophily was high  
471 ( $w = 0.99$ ), not only did group 2 experience a delayed outbreak, it also experienced a  
substantially lower peak infection rate, because the total number of infected individuals  
at the start of its outbreak was so much lower than that experienced by group 1. Thus,  
474 homophily can serve not only to delay an epidemic, but also to reduce it in the cases of  
lower transmissibility infections.

COUPLED DYNAMICS OF BEHAVIOR AND DISEASE

17

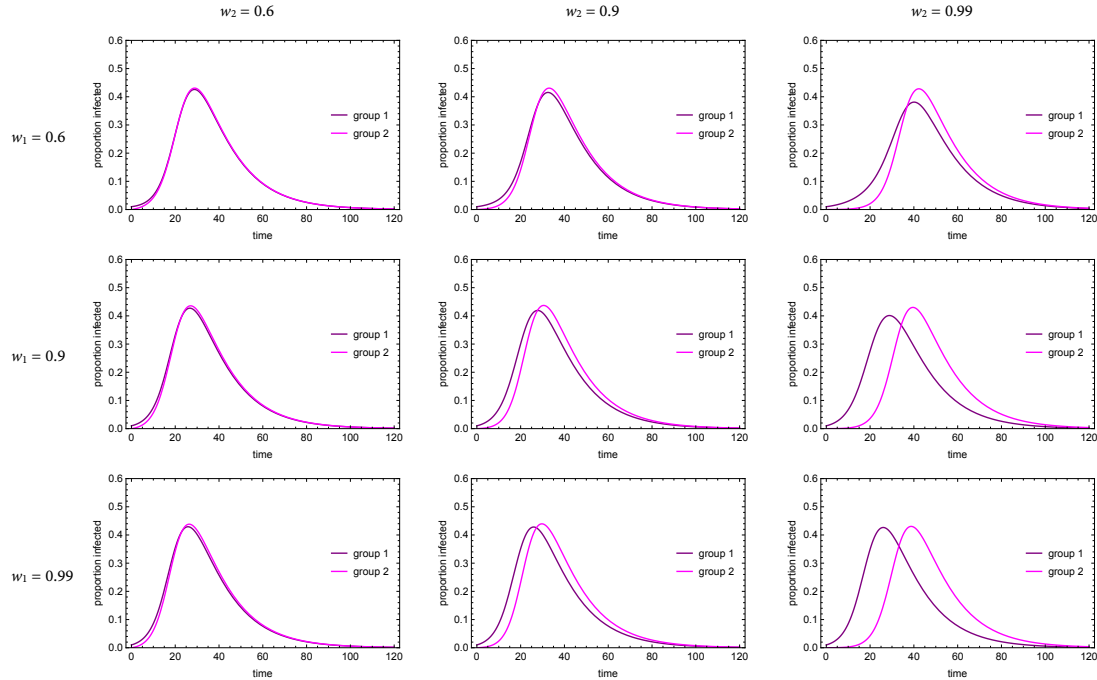

FIGURE S2. Infection dynamics in the SIR model with asymmetric homophily. Here  $\tau = 0.3$ ,  $\rho = 0.07$ .

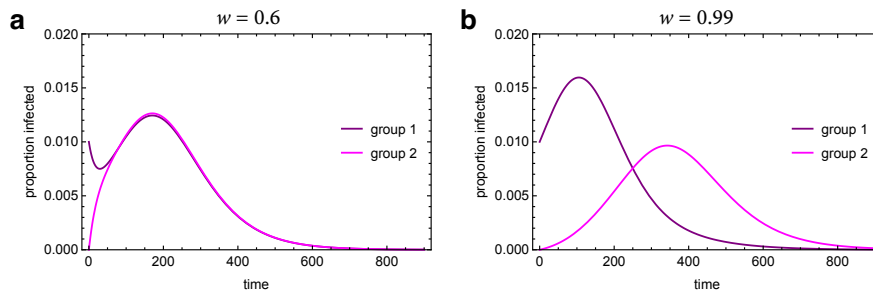

FIGURE S3. Infection dynamics in the SIR model with homophily when  $R_0$  is close to 1. Here  $\tau = 0.08$ ,  $\rho = 0.07$ ,  $w_1 = w_2 = w$ .

APPENDIX C. THE COUPLED CONTAGION MODEL

477 Our full model includes coupled dynamics between the SIR infection model with  
 homophily and the SIS behavioral adoption model with outgroup aversion. The adopted  
 behavior decreases the effective transmission rate of the infection due to measures like  
 480 social distancing. We model this by asserting that the transmission rate is  $\tau_C$  for careful  
 individuals and  $\tau_U$  for uncaredful individuals, such that  $\tau_U \geq \tau_C$ . When considering the

interaction between groups, we use the geometric mean, so the transmissibility between  
 483 SU and IU is  $\sqrt{\tau_U \tau_C}$ .

The model has six compartments, with two-letter abbreviations denoting the disease and behavioral state (Figure S4). The coupled dynamics for members of group 1 are as follows, with analogous equations governing members of group 2, such that our system is defined by 12 coupled differential equations:

$$\begin{aligned} \frac{d(SU_1)}{dt} &= [\delta + \gamma(SC_2 + IC_2 + RC_2)](SU_1) - [\alpha_1 + \beta(SC_1 + IC_1 + RC_1)](SU_1) - \\ &\quad \tau_U(SU_1)[w_1(IU_1) + (1 - w_1)IU_2] - \sqrt{\tau_U \tau_C}(SU_1)[w_1(IC_1 + (1 - w_1)IC_2)] \\ \frac{d(SC_1)}{dt} &= -[\delta + \gamma(SC_2 + IC_2 + RC_2)](SC_1) + [\alpha_1 + \beta(SC_1 + IC_1 + RC_1)](SU_1) - \\ &\quad \sqrt{\tau_U \tau_C}(SC_1)[w_1(IU_1) + (1 - w_1)IU_2] - \tau_C(SC_1)[w_1(IC_1 + (1 - w_1)IC_2)] \\ \frac{d(IU_1)}{dt} &= [\delta + \gamma(SC_2 + IC_2 + RC_2)](IU_1) - [\alpha_1 + \beta(SC_1 + IC_1 + RC_1)](IU_1) + \\ &\quad \tau_U(SU_1)[w_1(IU_1) + (1 - w_1)IU_2] + \sqrt{\tau_U \tau_C}(SU_1)[w_1(IC_1 + (1 - w_1)IC_2)] - \rho(IU_1) \\ \frac{d(IC_1)}{dt} &= -[\delta + \gamma(SC_2 + IC_2 + RC_2)](IC_1) + [\alpha_1 + \beta(SC_1 + IC_1 + RC_1)](IU_1) + \\ &\quad \sqrt{\tau_U \tau_C}(SC_1)[w_1(IU_1) + (1 - w_1)IU_2] + \tau_C(SC_1)[w_1(IC_1 + (1 - w_1)IC_2)] - \rho(IC_1) \\ \frac{d(RU_1)}{dt} &= [\delta + \gamma(SC_2 + IC_2 + RC_2)](RU_1) - [\alpha_1 + \beta(SC_1 + IC_1 + RC_1)](RU_1) + \rho(IU_1) \\ \frac{d(RC_1)}{dt} &= -[\delta + \gamma(SC_2 + IC_2 + RC_2)](RC_1) + [\alpha_1 + \beta(SC_1 + IC_1 + RC_1)](RU_1) + \rho(IC_1) \end{aligned}$$

#### APPENDIX D. COUPLED CONTAGION DYNAMICS

Here we present an extended version of the full model analysis presented in the main  
 486 text, that includes intermediate homophily of  $w_i = 0.9$ . Analysis with no outgroup  
 aversion is shown in Figure S5, and with outgroup aversion is shown in Figure S6.  
 The figures illustrate how homophily and outgroup aversion can interact to produce  
 489 unintuitive dynamics. When both forces are present, an infection that begins in group 1  
 can peak earlier and stronger in group 2, followed by a smaller peak in the group where  
 it began.

#### APPENDIX E. ANALYSIS OF BEHAVIORAL EFFICACY

In the main text analysis, we assumed that the adopted behavior reduced the trans-  
 mission to below the threshold for  $R_0 < 1$ . In other words, if everyone immediately and  
 495 universally adopted the behavior at the start of the outbreak, it would not become an  
 epidemic. Although we view this as a reasonable assumption (that is, the efficacy of the  
 behavior is reasonable, not the expectation that it will be either immediately or univer-  
 498 sally adopted), it is also worth examining what happens with the spread of behaviors  
 that reduce transmission, but not below epidemic levels. Figure S7 illustrates the model

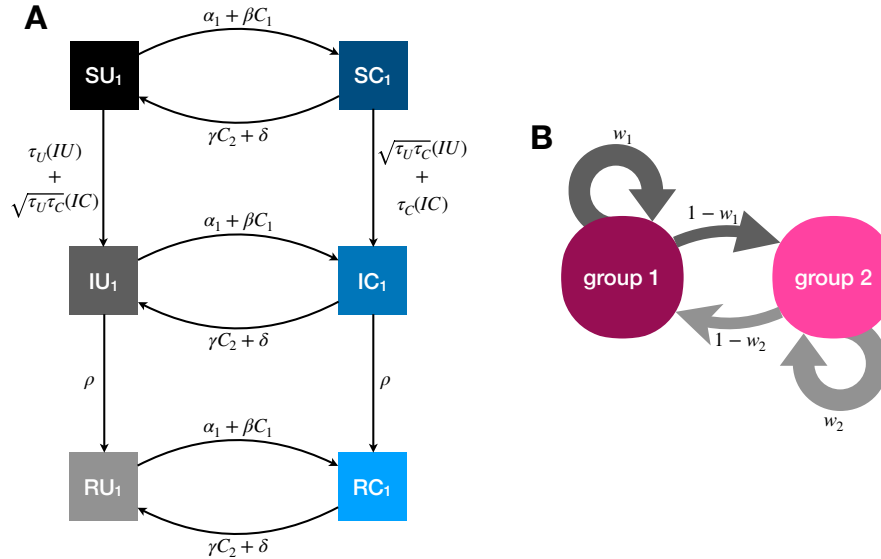

FIGURE S4. Illustration of the model dynamics. (A) Transition probabilities between compartments for members of group 1. For simplicity these probabilities do not include the influence of homophily. (B) homophilous interactions. Members of group  $i$  have physical contact with members of their own group with probability  $w_i$  and members of the outgroup with probability  $1 - w_i$ .

dynamics for varying levels of behavior efficacy ( $\tau_C$ ) with and without outgroup aversion and for both weak and strong homophily.

Without outgroup aversion ( $\gamma = 0$ ), the effect is clear: the more efficacious the behavior, the smaller the epidemic. This occurs because the behavior spreads effectively. With outgroup aversion, two things happen. First, the more effectively the behavior reduces transmission (that is, the smaller  $\tau_C$  is), the smaller the overall epidemic, but with an effect that is much stronger in group 1. In group 2, the effect of increased behavior efficacy is relatively small, because adoption is reduced and delayed. Second, the better the behavior reduces transmission, the bigger the delay in when group 1 experiences a “second wave.” This illustrates how complex the dynamics of disease transmission can become when even simple assumptions about behavior and group structure are considered.

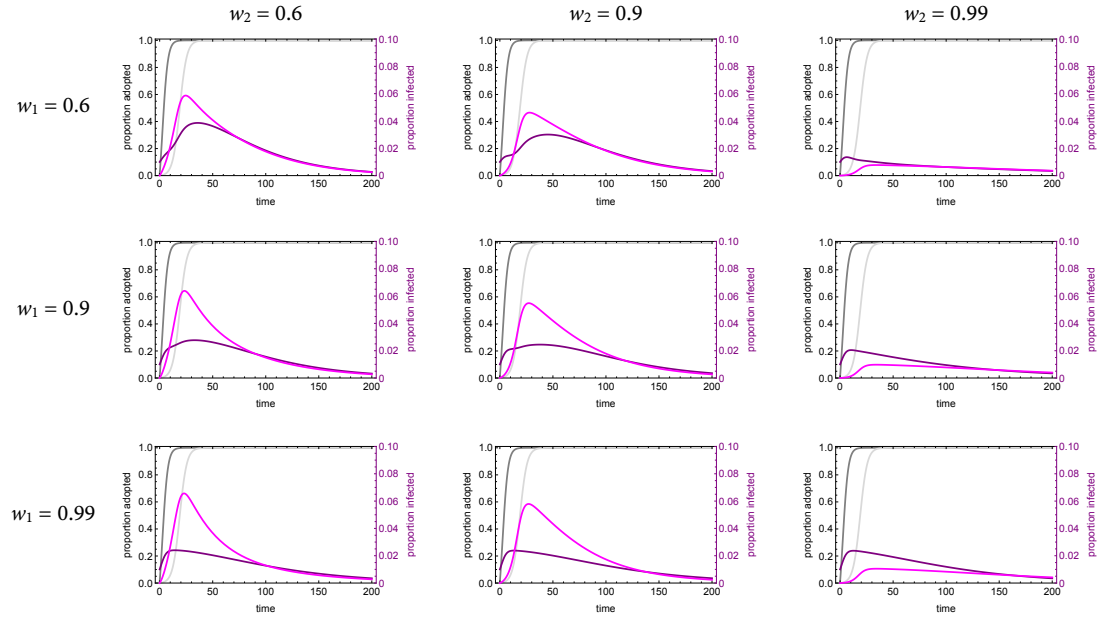

FIGURE S5. Coupled dynamics of the full model without outgroup aversion ( $\gamma = 0$ ) for with varying homophily. Darker lines are group 1, lighter lines are group 2. Parameters used:  $\tau_U = 0.3$ ,  $\tau_C = 0.069$ ,  $\rho = 0.07$ ,  $\alpha_2 = 0.1$ ,  $\alpha_2 = 0.001$ ,  $\beta = 0.3$ ,  $\delta = 0$ .

COUPLED DYNAMICS OF BEHAVIOR AND DISEASE

21

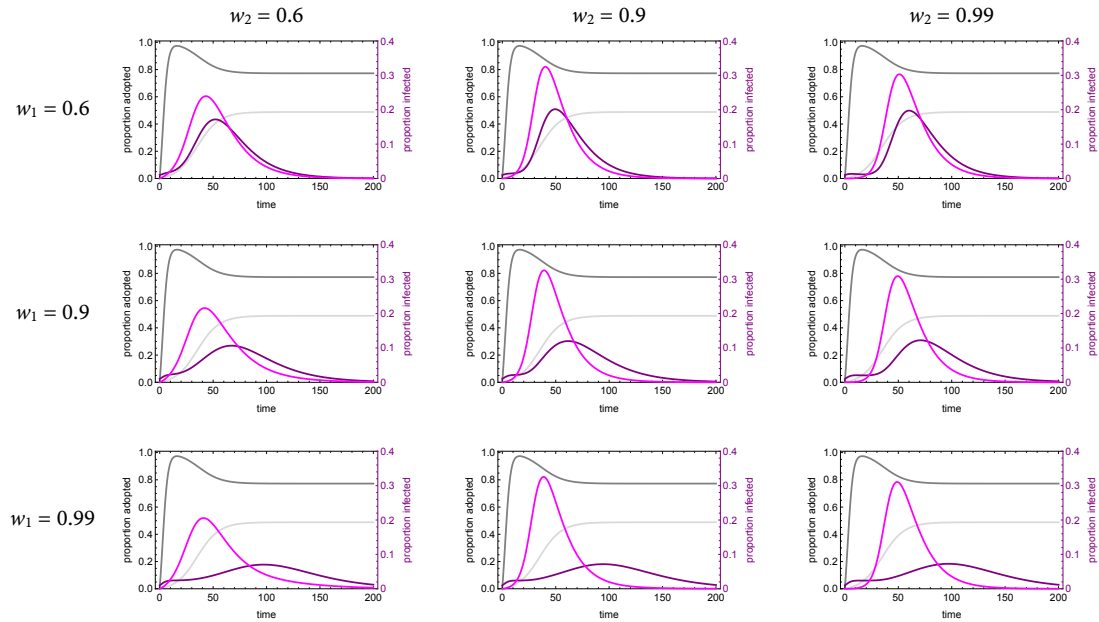

FIGURE S6. Coupled dynamics of the full model with outgroup aversion ( $\gamma = 0.2$ ) for with varying homophily. Darker lines are group 1, lighter lines are group 2. Parameters used:  $\tau_U = 0.3$ ,  $\tau_C = 0.069$ ,  $\rho = 0.07$ ,  $\alpha_2 = 0.1$ ,  $\alpha_2 = 0.001$ ,  $\beta = 0.3$ ,  $\delta = 0$ .

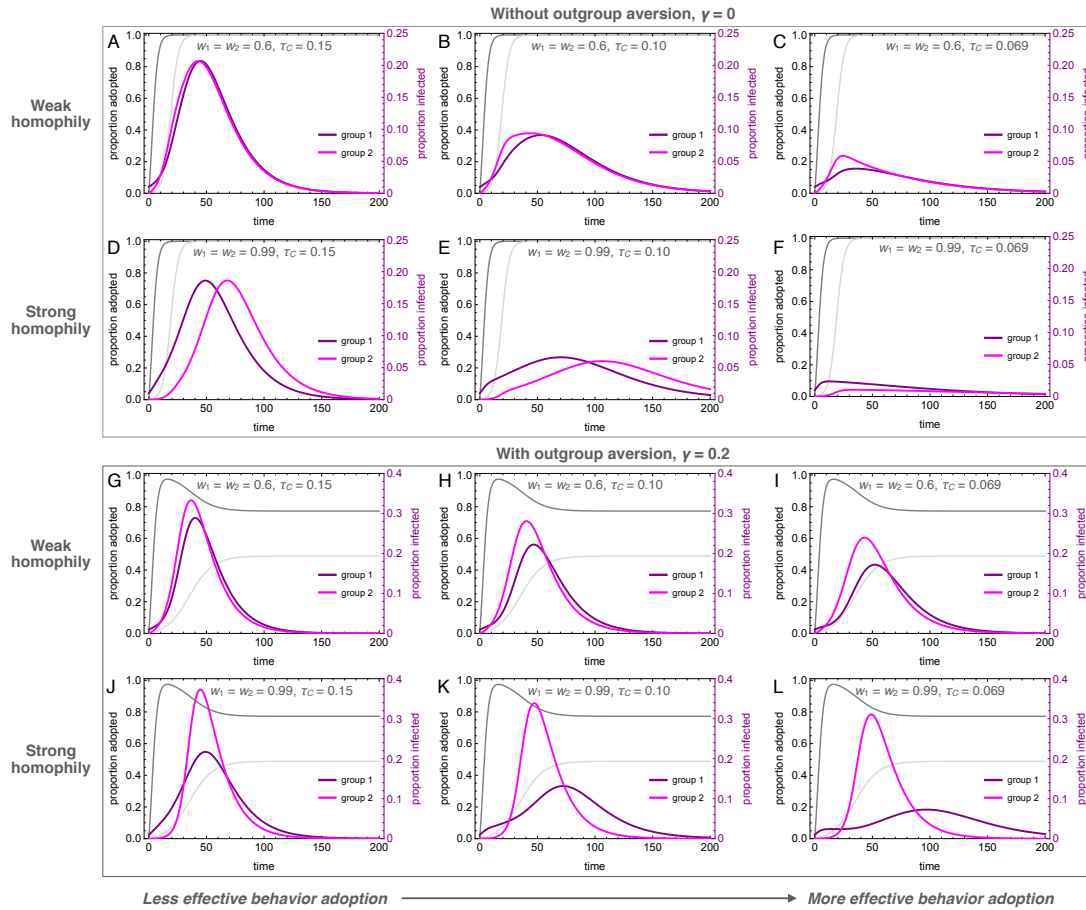

FIGURE S7. Coupled dynamics of the full model for varying levels of behavior efficacy,  $\tau_C = \{0.15, 0.1, 0.069\}$ , where only the last case would provide  $R_0 < 1$  if immediately and universally adopted at the start of the outbreak. We provide analyses with and without outgroup aversion and for both weak and strong homophily. Darker lines are group 1, lighter lines are group 2. Parameters used:  $\tau_U = 0.3$ ,  $\rho = 0.07$ ,  $\alpha_2 = 0.1$ ,  $\alpha_2 = 0.001$ ,  $\beta = 0.3$ ,  $\delta = 0$ .
